# Supplementary material
Source: PubMed Central journal article supplement (PMC2002611)
Supplement: plntcell_tpc.107.050708_1.pdf [file plntcell_tpc.107.050708_1.pdf]

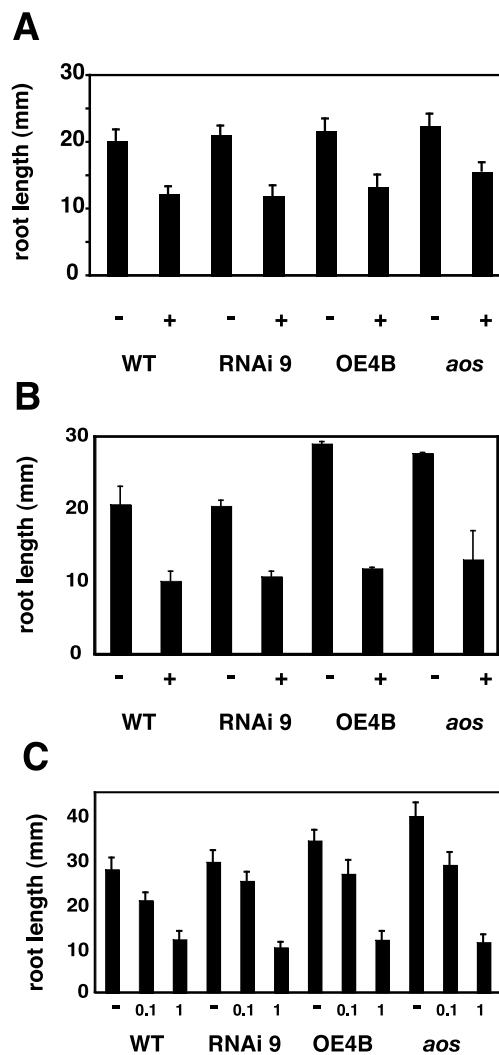

Figure S1

Primary root length measured after vertical growth on medium containing either sodium chloride, salicylic acid, or indole 3-acetic acid.

A. Plants were grown for 7d in the presence of no sodium chloride (-) or 0.1 M (+) sodium chloride (n = 7, SD). B. Plants were grown for 7 d with either no salicylic acid (-) or 50  $\mu$ M (+) salicylic acid (n = 10 to 12, SD). C. Plants were grown for 8d with no indole 3-acetic acid (-) or 0.1  $\mu$ M or 1  $\mu$ M indole 3-acetic acid (N = 9 to 10).
