# Supplementary material
Source: PubMed Central journal article supplement (PMC2002611)
Supplement: plntcell_tpc.107.050708_2.pdf [file plntcell_tpc.107.050708_2.pdf]

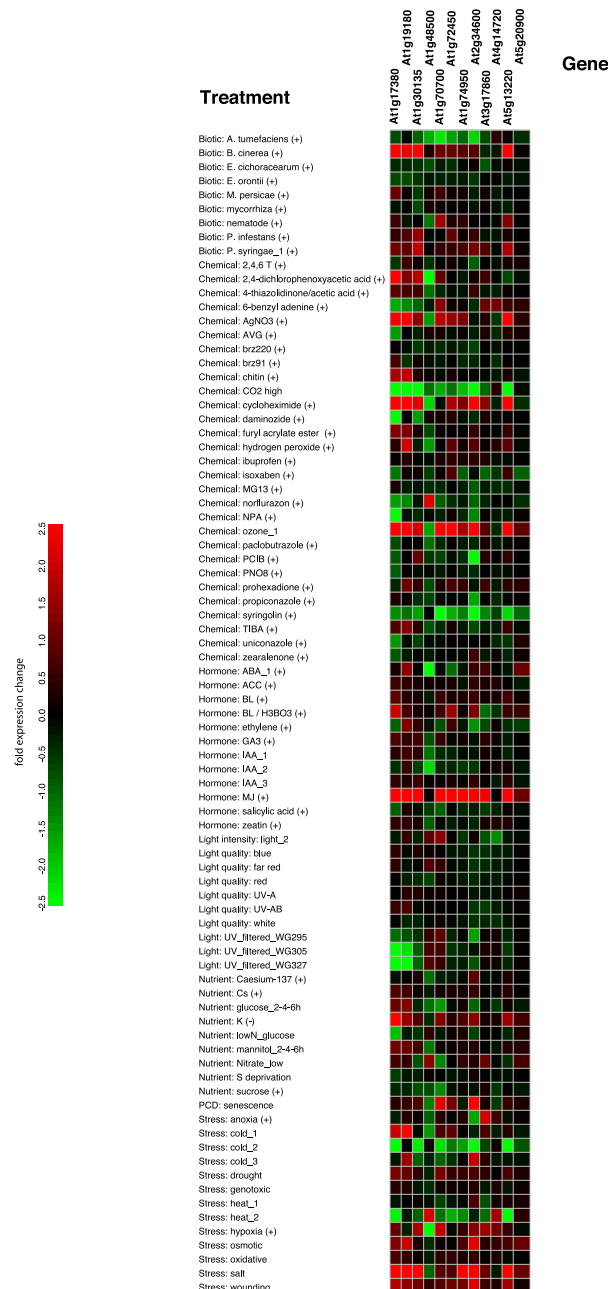

Figure S2

### Expression characteristics of Zim-Jas motif genes

Expression of 12 of the 14 genes listed in Table 2 of Yan et al. The data show that various treatments such as ozone exposure, methyl jasmonate treatment, wounding and salt treatment all upregulate several genes whereas *Agrobacterium tumefaciens* infection, high carbon dioxide, and syringolin treatment all downregulate the levels of mRNAs for several Zim-Jas genes. The expression data are from Genevestigator (Zimmermann et al., 2004).

Zimmermann, P., Hirsch-Hoffmann, M., Hennig, L. and Gruissem, W. (2004) GENEVESTIGATOR. Arabidopsis Microarray Database and Analysis Toolbox. Plant Physiol. 136, 2621-2632.
