# Supplementary material
Source: PubMed Central journal article supplement (PMC2002611)
Supplement: plntcell_tpc.107.050708_3.pdf [file plntcell_tpc.107.050708_3.pdf]

SOM for Yan et al.

### Figure S1 Legend

Primary root growth measured after vertical growth on medium containing either sodium chloride, salicylic acid, or indole 3-acetic acid.

A, plants were grown for 7d in the presence of no sodium chloride (-) or 0.1 M (+) sodium chloride (n=7, SD). B, plants were grown for 7d with either no salicylic acid (-) or 50  $\mu$ M (+) salicylic acid (N=10 to 12, SD). C, plants were grown for 8d with no indole-3-acetic acid (-) or 0.1  $\mu$ M or 1  $\mu$ M indole-3-acetic acid (n=9 to 10, SD).

### Figure S2 legend

Expression characteristics of Zim-Jas genes

Expression of 12 of the 14 genes listed in Table 2 of Yan et al. The data show that various treatments such as ozone exposure, methyl jasmonate treatment, wounding and salt treatment all upregulate several genes whereas *Agrobacterium tumefaciens* infection, high CO<sub>2</sub>, and syringolin treatment all downregulate the levels of mRNAs for several Zim-Jas genes. The expression data is from Genevestigator (Zimmermann et al., 2004).

**Zimmermann, P., Hirsch-Hoffmann, M., Hennig, L. and Gruissem, W. (2004)**

GENEVESTIGATOR. Arabidopsis Microarray Database and Analysis Toolbox. Plant Physiol. **136**, 2621-2632.
